# Supplementary material for: The role of eosinophil morphology in distinguishing between reactive eosinophilia and eosinophilia as a feature of a myeloid neoplasm
Source: PubMed Central journal article supplement — Br J Haematol. 2020 Aug 29;191(3):497–504. doi: 10.1111/bjh.17026 (PMC7693085; doi:10.1111/bjh.17026), 2020-08-29
Supplement: BJH-191-497-s001.pdf [file BJH-191-497-s001.pdf]

# Tutorial for evaluation of eosinophils in healthy volunteers, in neoplastic diseases and in reactive situations.

## Definition of normal eosinophils:

**Marcel Bessis:** *Living Blood Cells and Their Ultrastructure. Springer Verlag Berlin. Heidelberg New York. 1973.*  
*Eosinophils precursors and granulocytes. p 32,*

« Usually the eosinophil granulocyte has a nucleus with two segments that may be poorly distinguishable because of the mass of cytoplasmic granules. » (He reported 6% non-lobed, 68% 2 lobes, 22% 3 lobes, and 4% 4 lobes).

**Barbara Bain:** *Blood Cells, A Practical Guide. Wiley Blackwell 2015, pp. 119-122:*

« The nucleus is usually bilobed but occasional nuclei are trilobed .... In females eosinophils may have a drumstick. Eosinophil granules are spherical ... they pack the cytoplasm and stain reddish-orange. Very occasional eosinophils in healthy subject contain some granules with basophilic staining characteristics.

Codes to be used for the evaluation

| Code                                                                  | Classification                      | Comment                                                                                                                                   |
|-----------------------------------------------------------------------|-------------------------------------|-------------------------------------------------------------------------------------------------------------------------------------------|
| 0                                                                     | Normal                              | Nucleus has two or three lobes, the cytoplasm is not degranulated and there are few if any vacuoles; any vacuoles are generally small.    |
| 1a                                                                    | Non-lobated , band form             | Mature eosinophil but with no lobation, nucleus in the form of a band.                                                                    |
| 1b                                                                    | Non-lobated , round or oval nucleus | Mature eosinophil but with no lobation, nucleus round or oval.                                                                            |
| 2                                                                     | Hyperlobated nucleus                | Four or more nuclear lobes                                                                                                                |
| 3                                                                     | Ring nucleus                        | A circular nucleus; be careful to exclude band forms with overlapping ends                                                                |
| 4                                                                     | Binuclearity                        | Cell clearly has two nuclei, not including cells with two round nuclear lobes close together with joining filament not clearly visualised |
| 5                                                                     | Moderately hypogranular             | Moderately hypogranular but hypogranular cytoplasm less than 25% of cytoplasmic area                                                      |
| 6                                                                     | Markedly hypogranular               | Agranular cytoplasm 25% or more of cytoplasmic area                                                                                       |
| 7                                                                     | Moderately vacuolated               | Moderately vacuolated but vacuoles occupying less than 25% of cytoplasm                                                                   |
| 8                                                                     | Markedly vacuolated                 | Vacuoles occupying 25% or more of cytoplasm                                                                                               |
| 9                                                                     | Basophilic granules                 | Some granules with basophilic (purplish) staining characteristics                                                                         |
| <b>Grade of cytological abnormality</b>                               |                                     | Absent    Mild    Moderate    Severe                                                                                                      |
| <b>Do you think the patient is likely to have a myeloid neoplasm?</b> |                                     | Yes            No                                                                                                                         |
|                                                                       |                                     | Overall assessment after viewing all images                                                                                               |

Code 0

Normal Eosinophil

Nucleus has two or three lobes, the cytoplasm is not degranulated and there are few if any vacuoles; any vacuoles are generally small

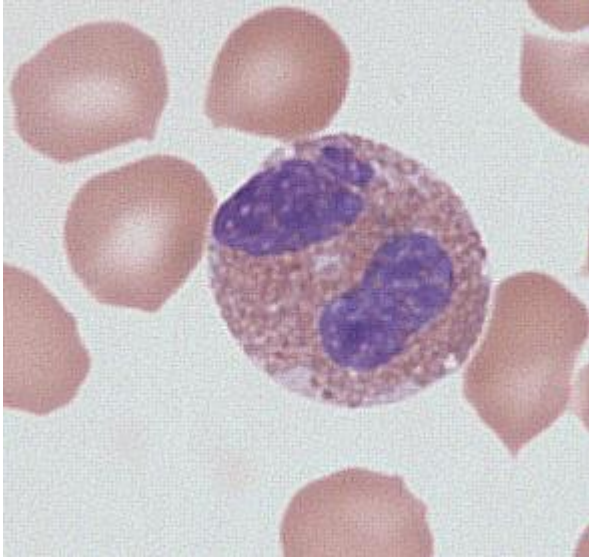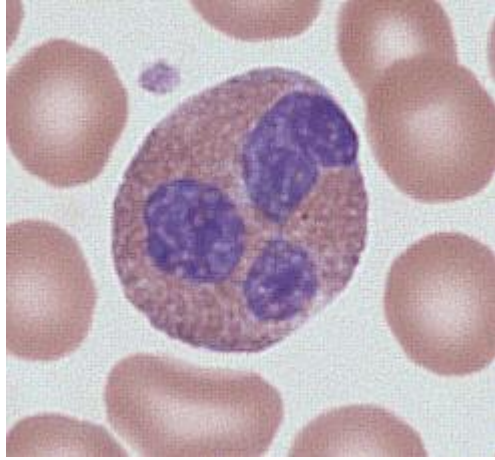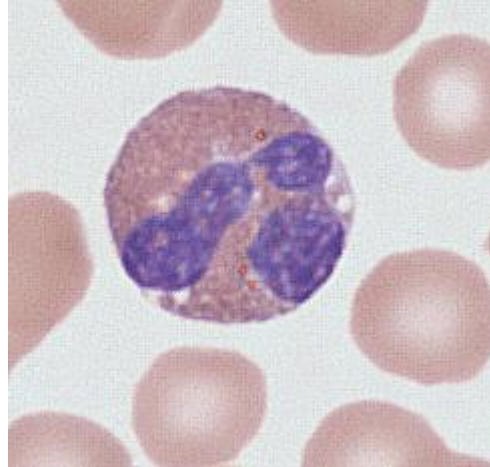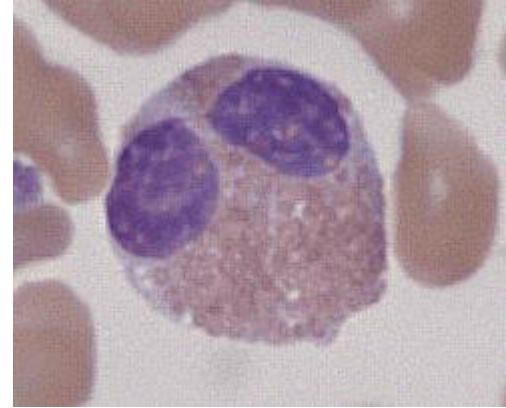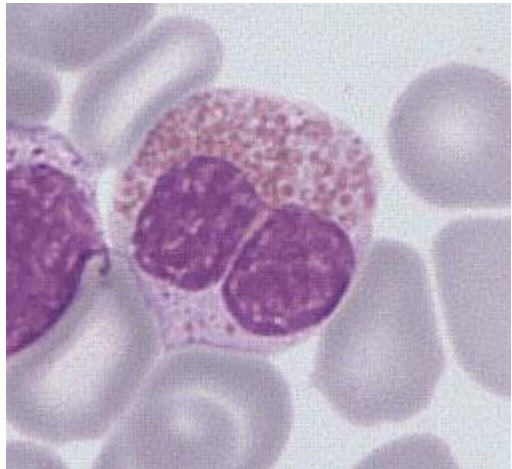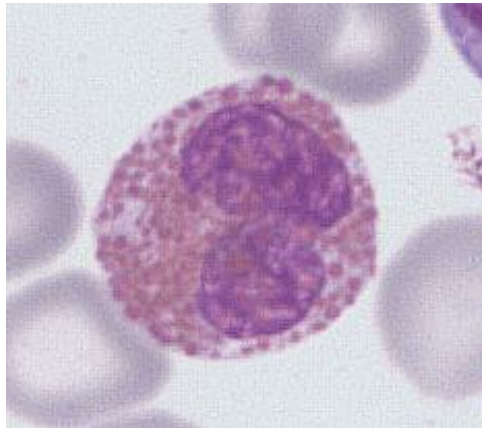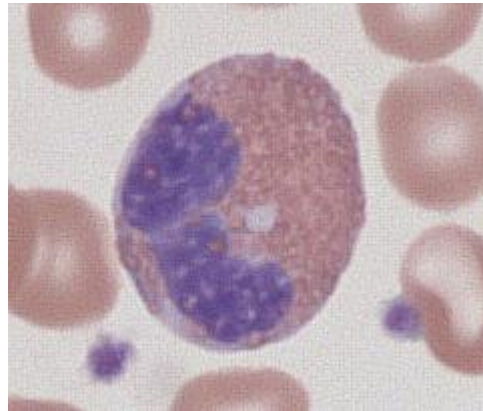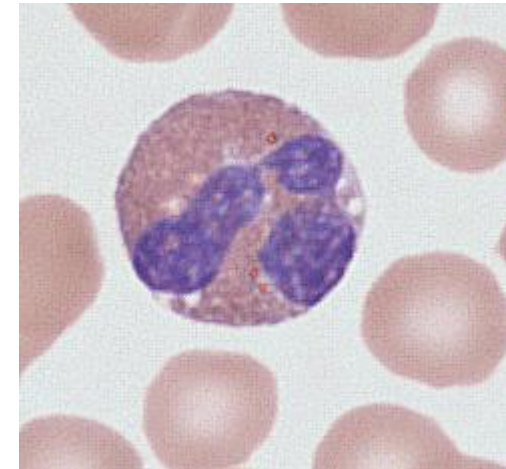

|         |                                |                                                                               |
|---------|--------------------------------|-------------------------------------------------------------------------------|
| Code 1a | Non-lobated nucleus, band form | Mature eosinophil but with no nuclear lobation, nucleus in the form of a band |
|---------|--------------------------------|-------------------------------------------------------------------------------|

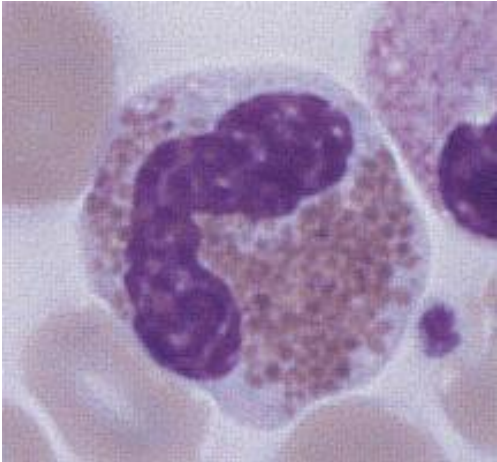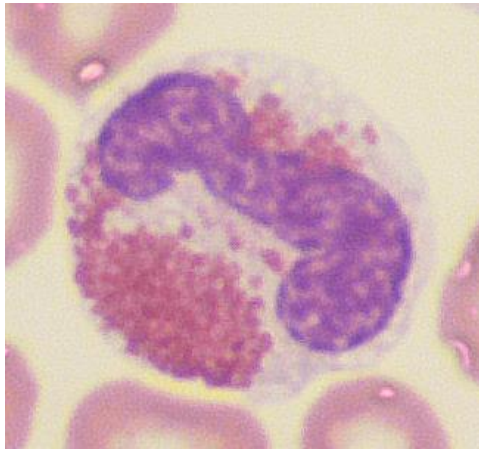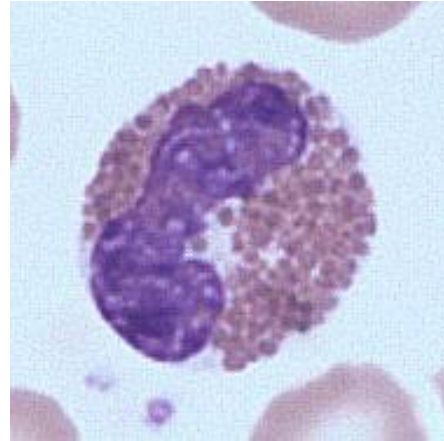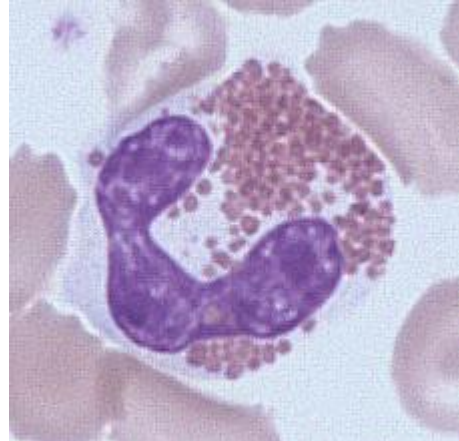

|         |                                            |                                                                       |
|---------|--------------------------------------------|-----------------------------------------------------------------------|
| Code 1b | Non-lobated nucleus, round or oval nucleus | Mature eosinophil but with no nuclear lobation, nucleus round or oval |
|---------|--------------------------------------------|-----------------------------------------------------------------------|

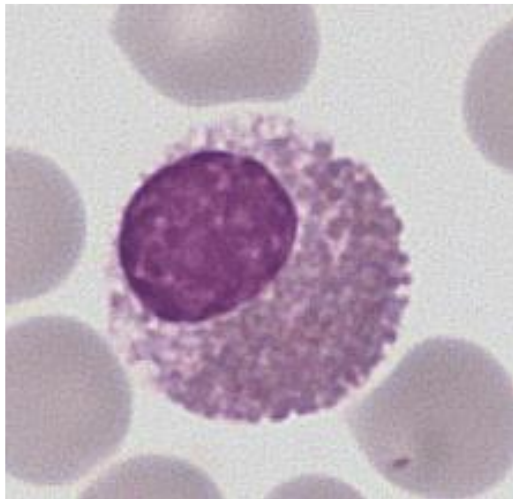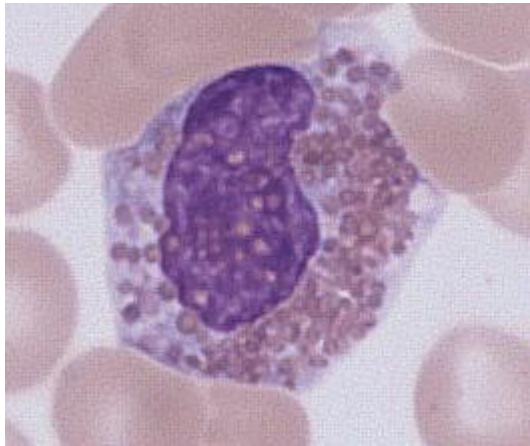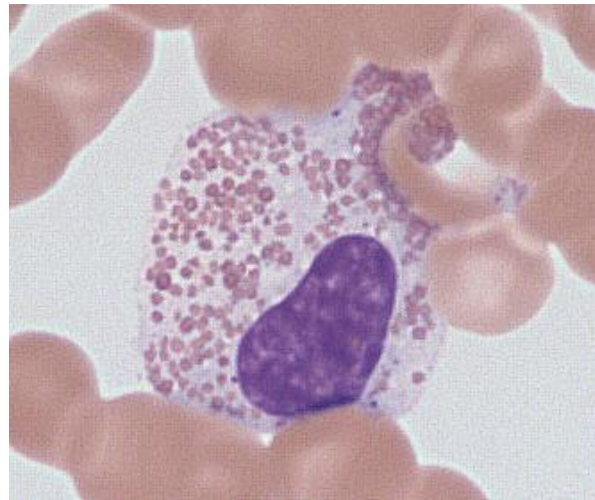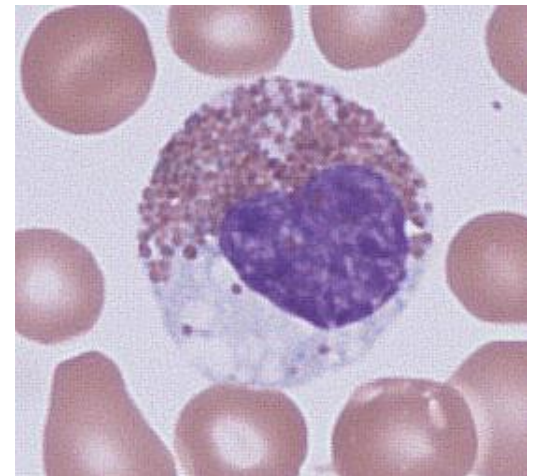

Code 2

Hyperlobated nucleus

Four or more nuclear lobes

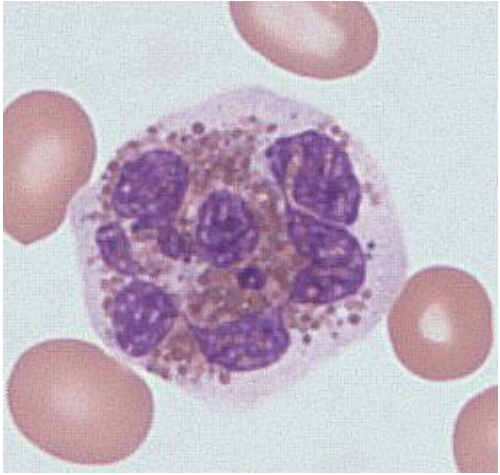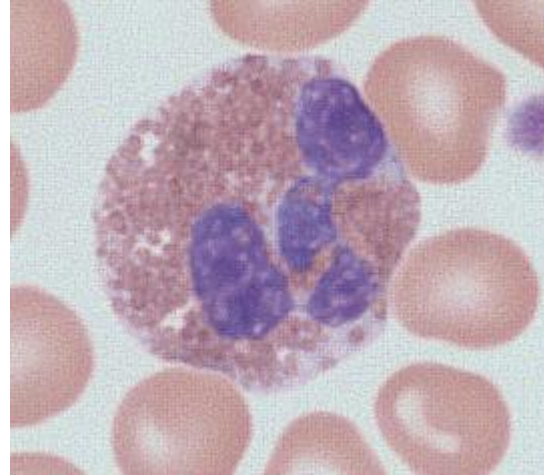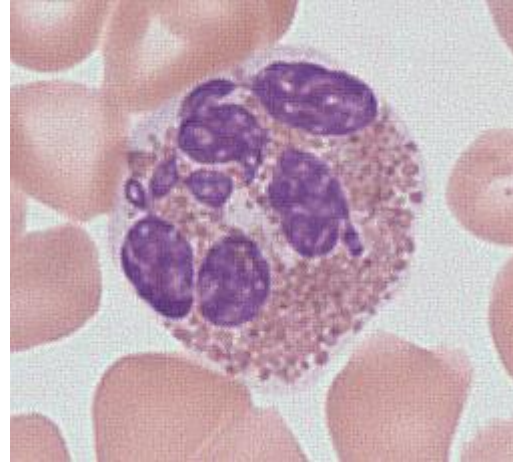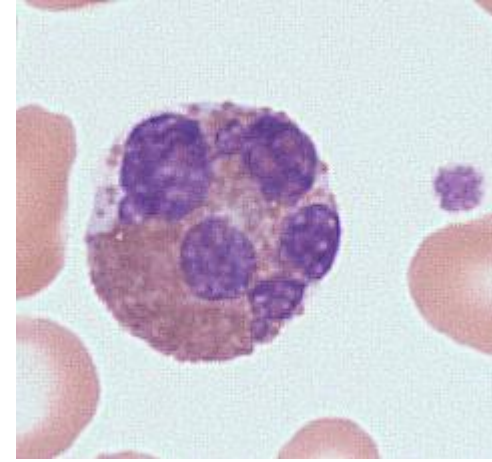

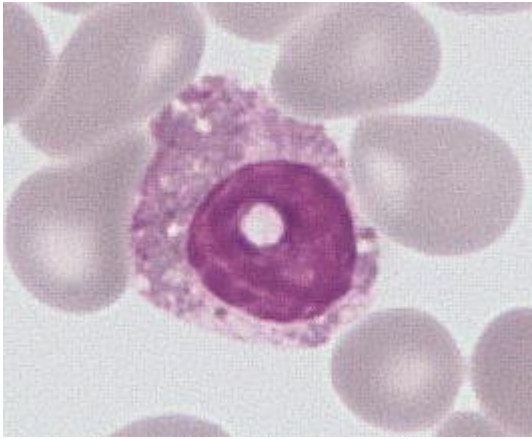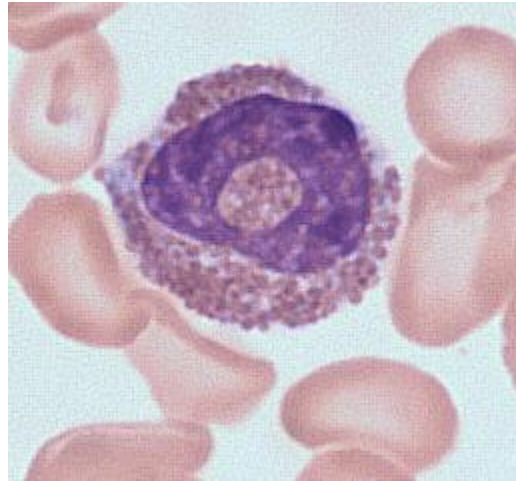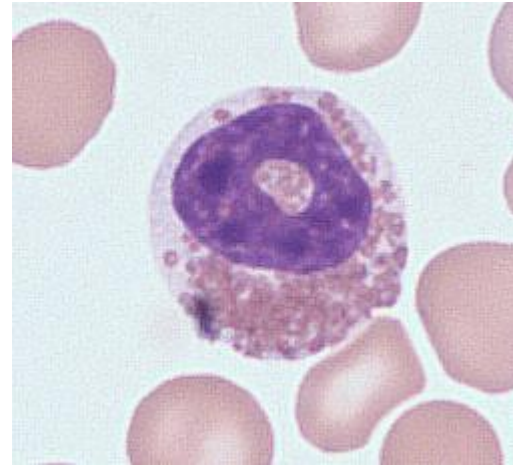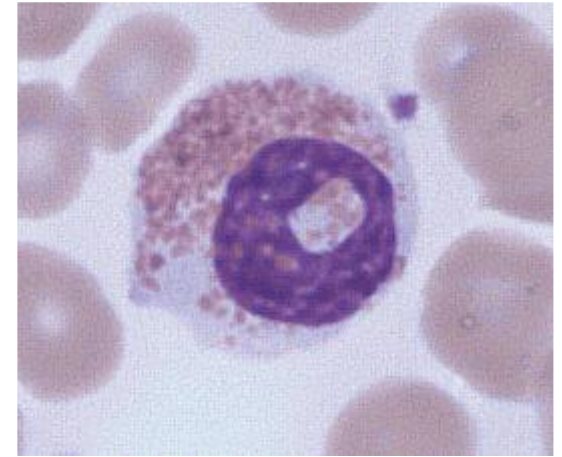

4

## Binuclearity

Cell clearly has two nuclei, not including cells with two round nuclear lobes close together with joining filament not clearly visualised

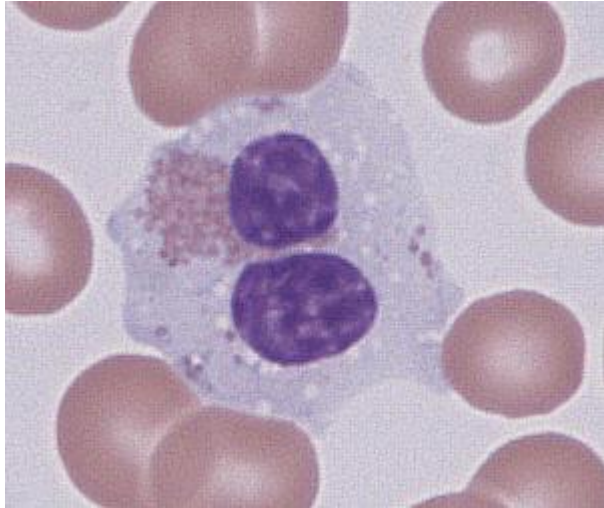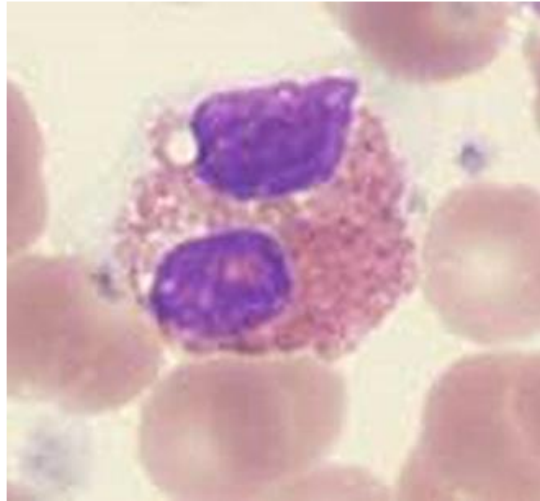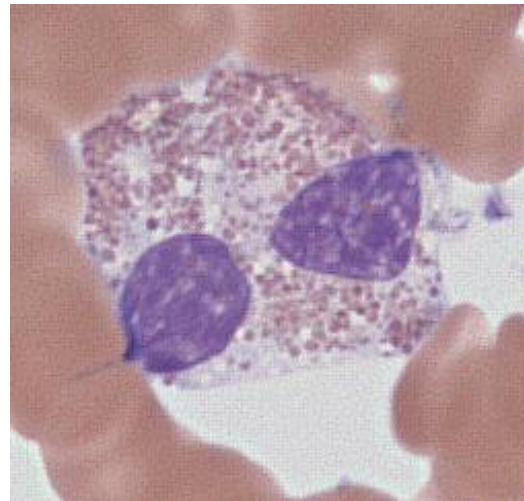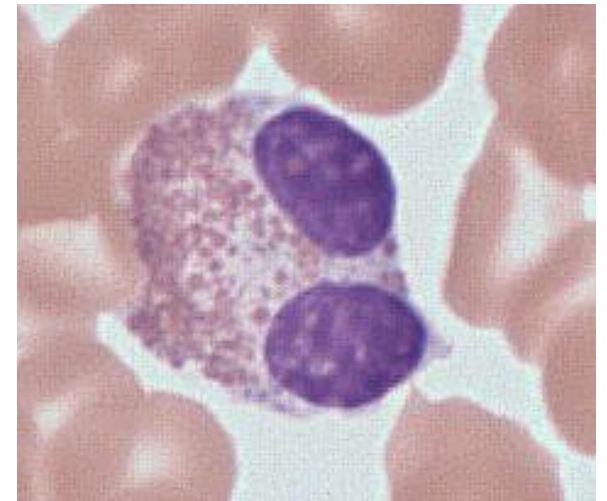

5

Moderately hypogranular

Agranular cytoplasm less than 25% of cytoplasmic area

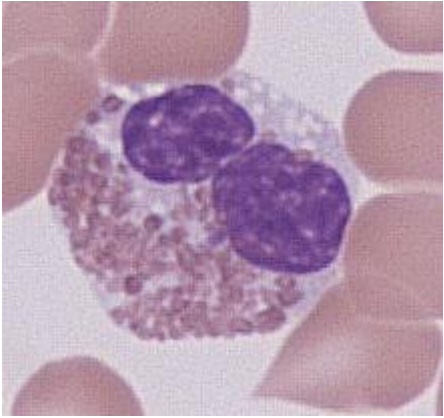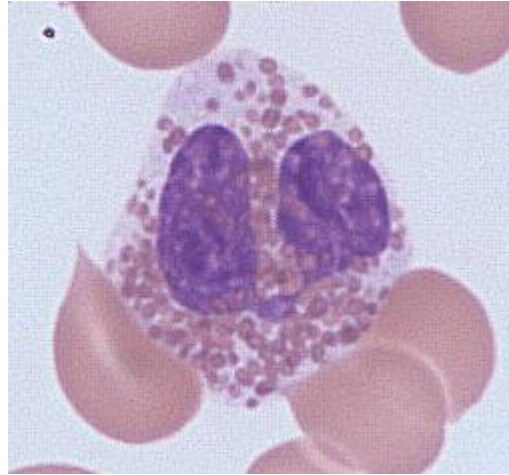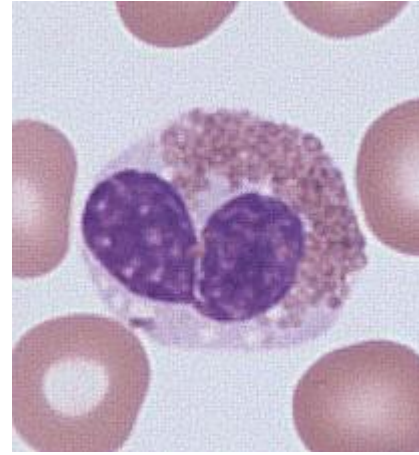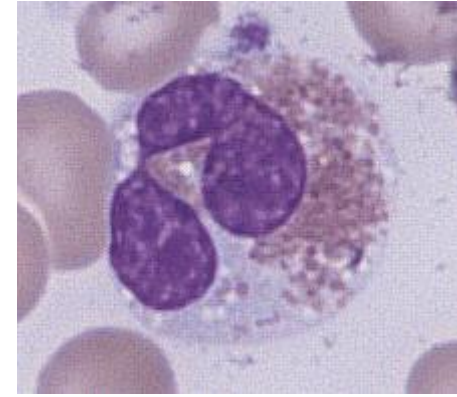



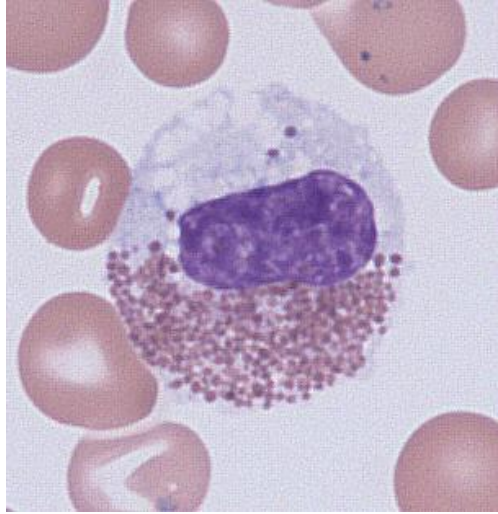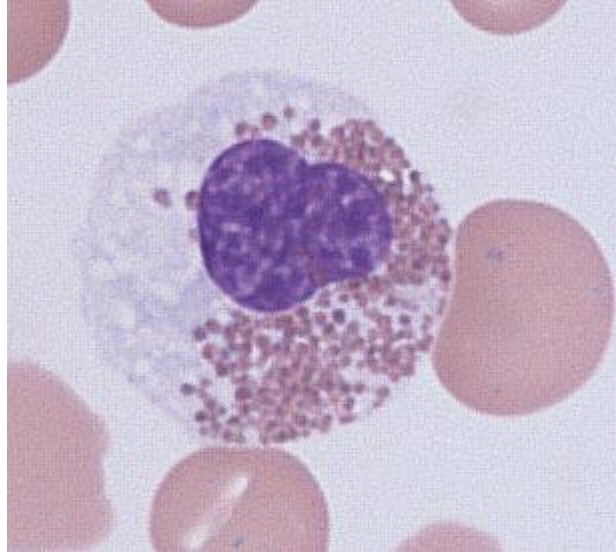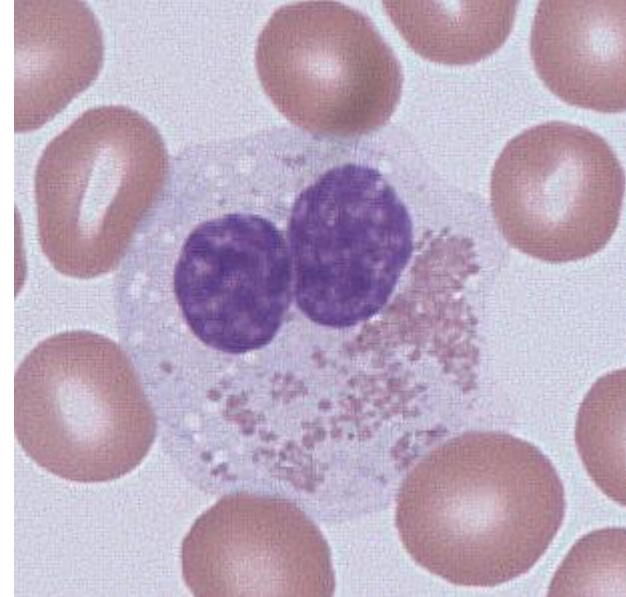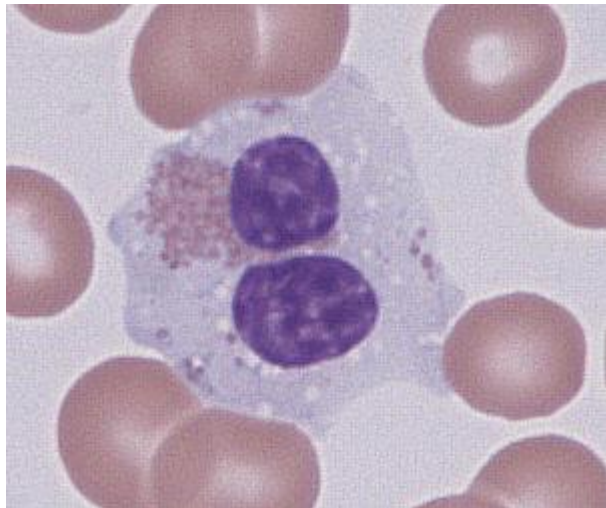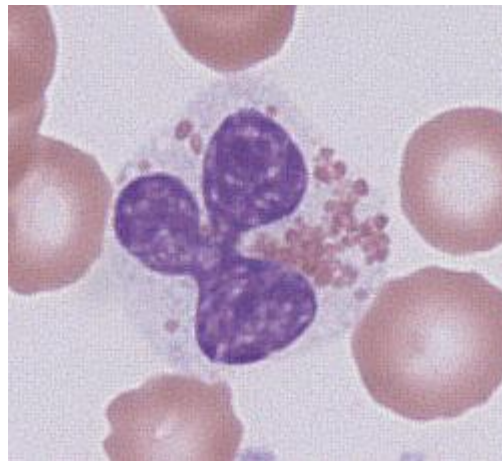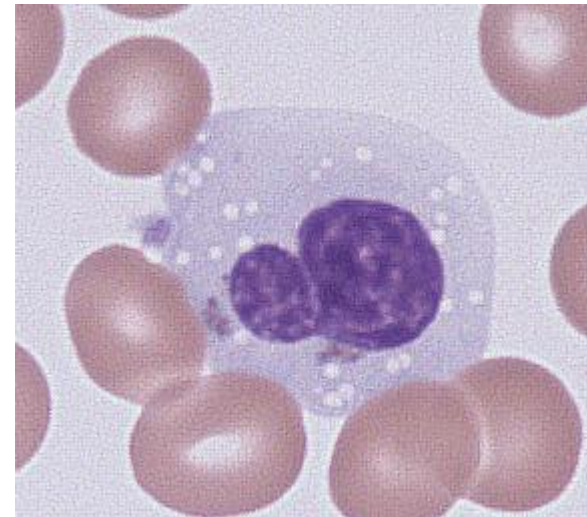

7

Moderately vacuolated

Vacuoles occupying less than 25% of cytoplasm

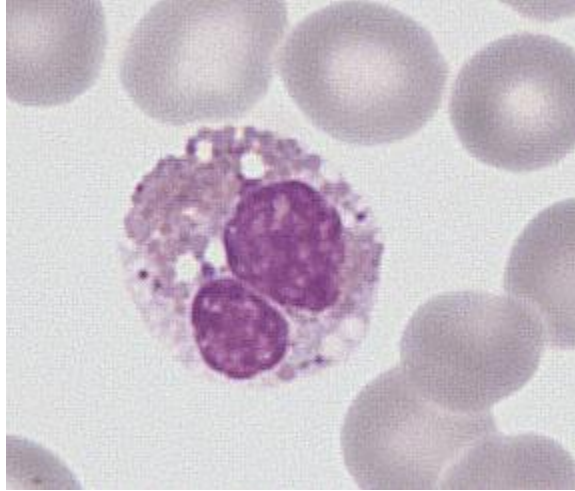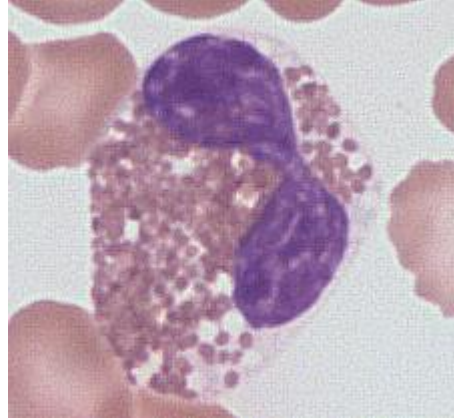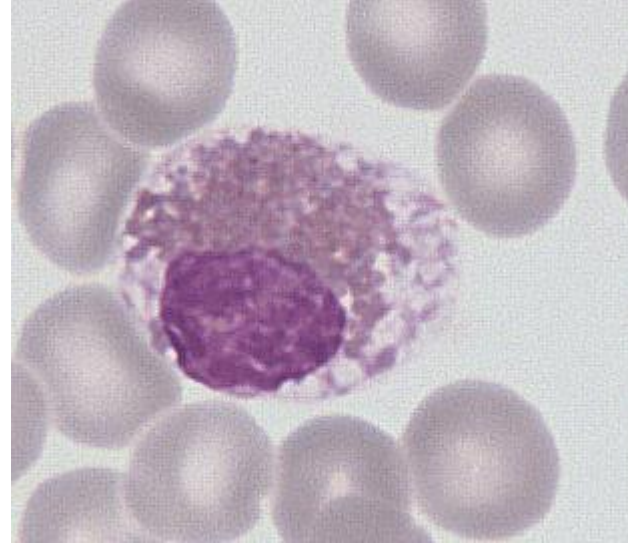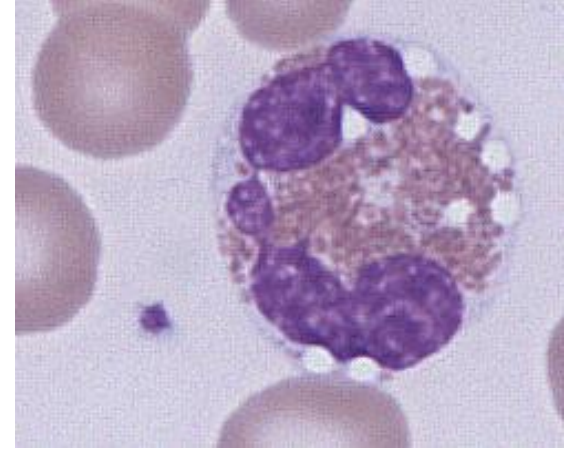

8

Markedly vacuolated

Vacuoles occupying 25% or more of cytoplasm

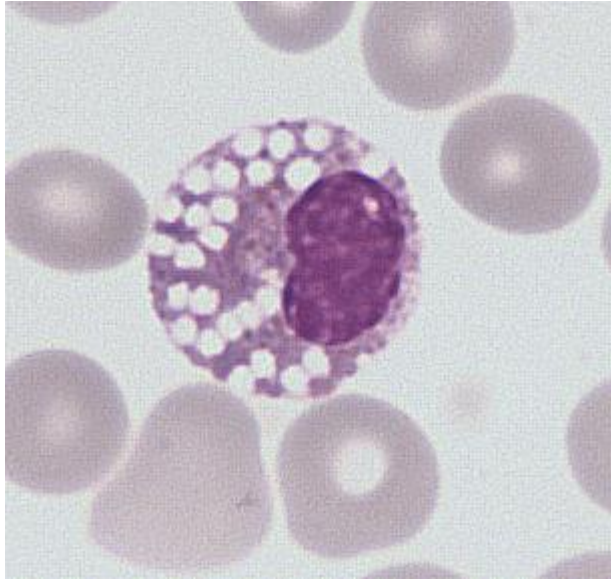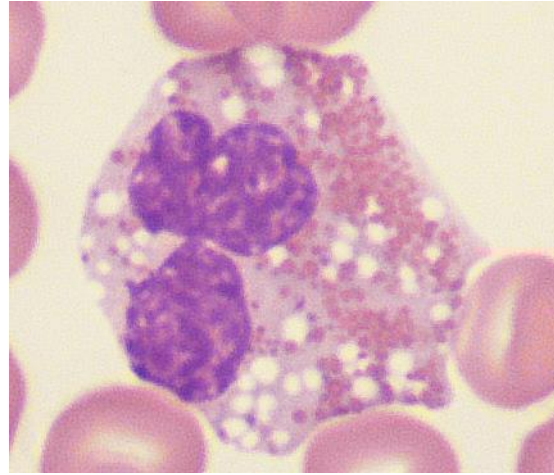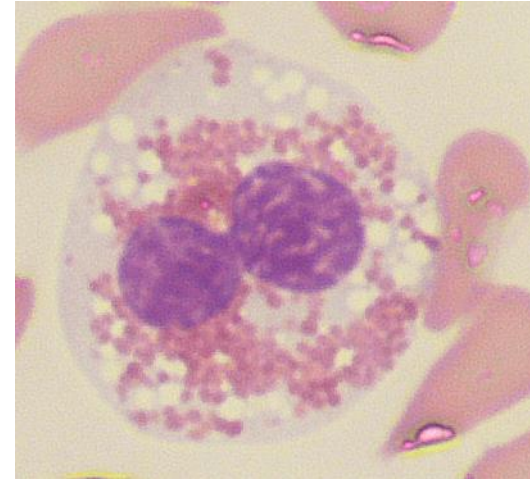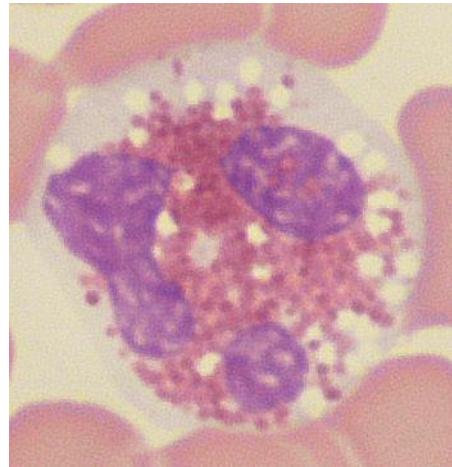

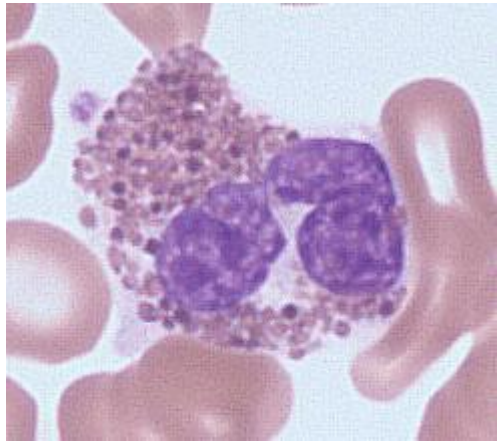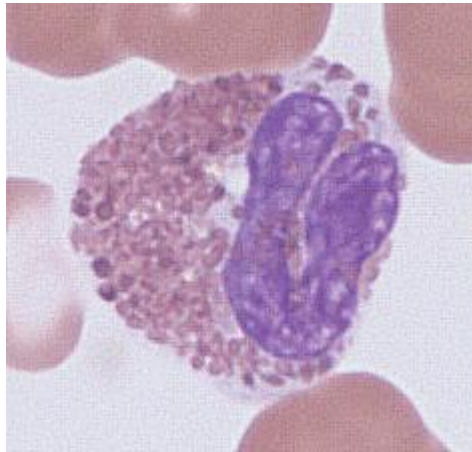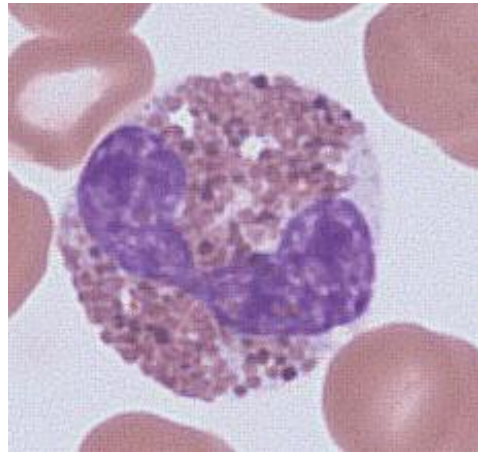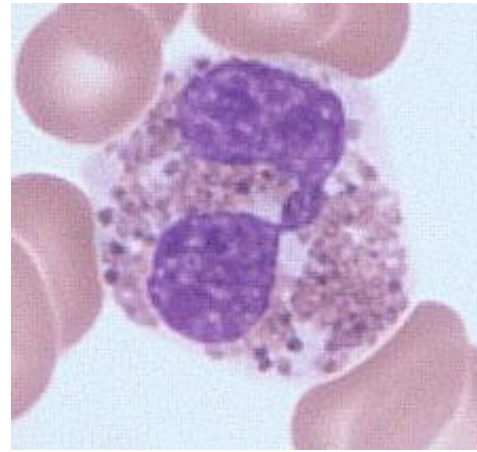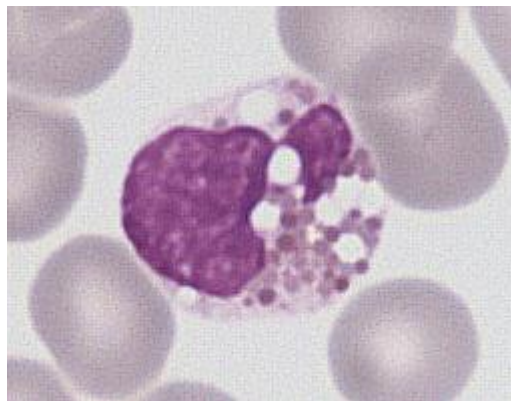

2 or 3 abnormalities  
in the same cell

If a cell has more than one abnormality,  
assign all relevant codes to it

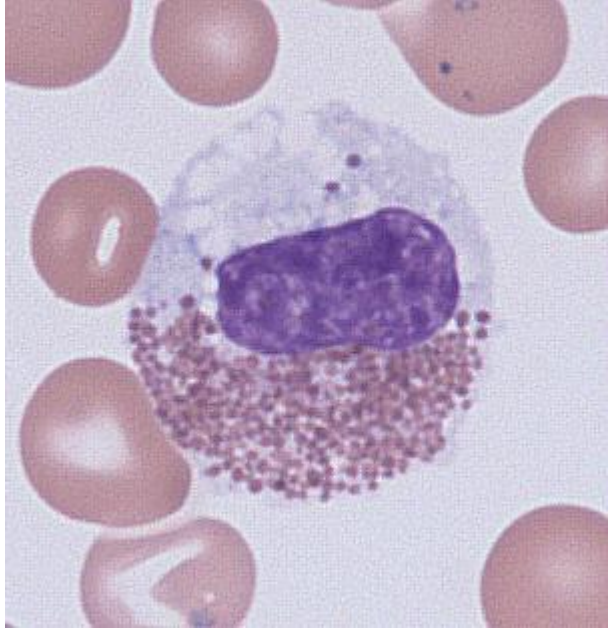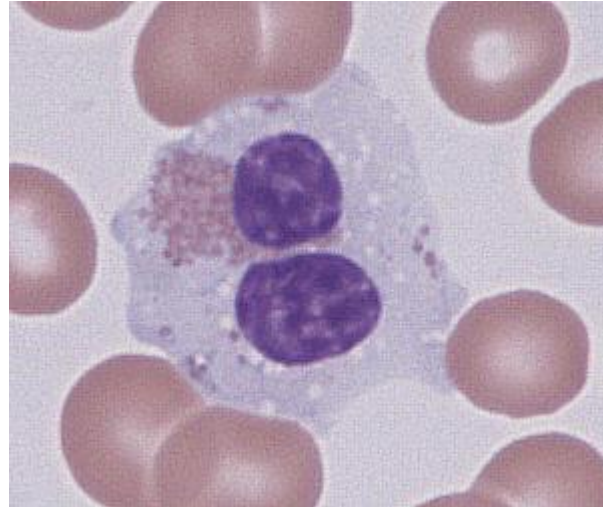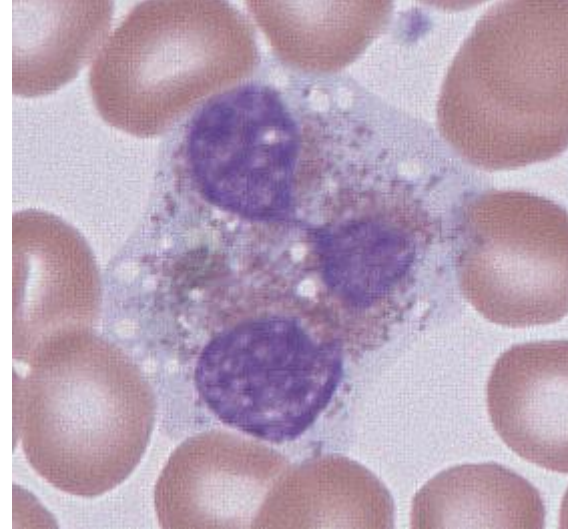

Code: 1b 6 7

Code: 4 6 7

Code: 5 7

Caution: no comma no dot between two codes, only one letter space.

Grade of cytological abnormality

Absent

Mild

Moderate

Severe

This is an overall assessment of the case, after you have evaluated all eosinophils. It is a subjective assessment of the degree of cytological abnormality. It should take into account nuclear abnormalities (hyperlobated, non lobated, ring form), vacuolation and hypogranularity. The purpose of this assessment is to be able to compare the overall degree of cytological abnormality in reactive and neoplastic conditions
